# Supplementary material
Source: publisher figshare collection journal article supplement (https://acs.figshare.com/ndownloader/files/25557227)
Supplement: Supplementary file 1 [file 25557227]

# Supporting Information

## Electrochemically Controlled ATRP for Cleavage-Based Electrochemical Detection of Prostate-Specific Antigen at the Concentration of Femtomolar Level

Qiong Hu, Shiyu Gan, Yu Bao, Yuwei Zhang\*, Dongxue Han, and Li Niu

*Center for Advanced Analytical Science, School of Chemistry and Chemical Engineering, Guangzhou*

*University, Guangzhou 510006, P. R. China. E-mail: [ccywzhang@gzhu.edu.cn](mailto:ccywzhang@gzhu.edu.cn). Tel.:*

*+86-020-39366902.*

### Table of Contents:

**Figure S-1:** Cyclic voltammogram of the AuE/MCH/P-COOH/Zr(IV)/BPAA in the FcMMA-free polymerization solution.

**Figure S-2:** Reduction wave of the dissolved oxygen.

**Figure S-3:** Reductive desorption of PSA peptides using LSV.

**Figure S-4:** Elemental mappings of Zr and Br.

**Figure S-5:** Peak currents before and after a storage at 4 °C for two weeks.

**Figure S-6:** Peak current toward the untreated NHS.

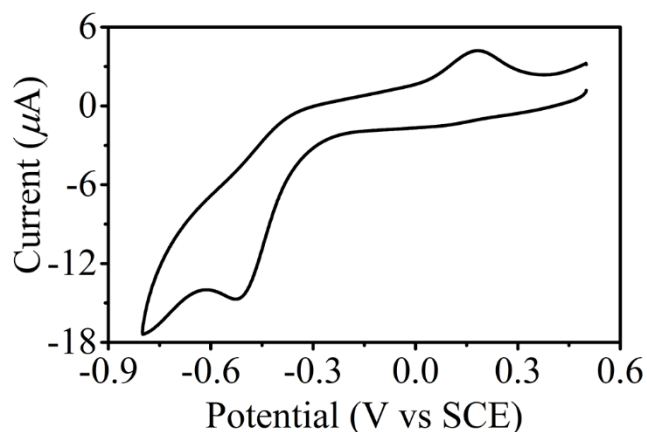

**Figure S-1:** Cyclic voltammogram of the AuE/MCH/P-COOH/Zr(IV)/BPAA in the FcMMA-free polymerization solution. PSA, 10 nM; scan rate,  $0.1 \text{ V s}^{-1}$ .

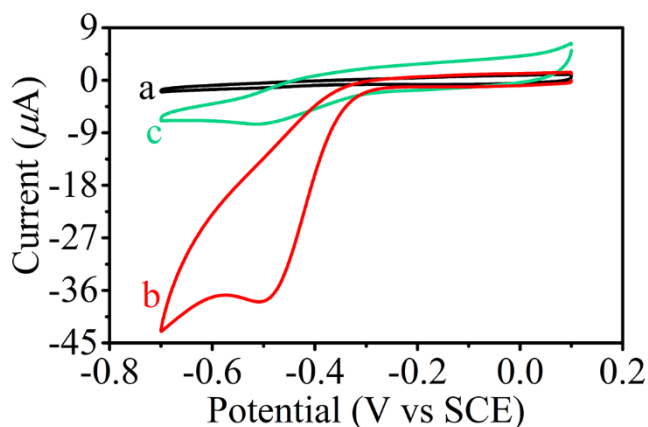

**Figure S-2:** Cyclic voltammogram of the AuE/MCH/P-COOH/Zr(IV)/BPAA in the (a)  $\text{N}_2$ - or (b)  $\text{O}_2$ -saturated, FcMMA- and  $\text{Cu}^{\text{II}}\text{Br}/\text{Me}_6\text{TREN}$ -free polymerization solution, or in the (c)  $\text{N}_2$ -saturated, FcMMA-free polymerization solution. PSA, 10 nM; scan rate,  $0.1 \text{ V s}^{-1}$ ;  $\text{Cu}^{\text{II}}\text{Br}/\text{Me}_6\text{TREN}$ , 0.5 mM. From curves b and c, it is clear to see that the reduction wave of oxygen overlaps with that of the  $\text{Cu}^{\text{II}}\text{Br}/\text{Me}_6\text{TREN}$  deactivator. That is, the dissolved oxygen is consumed during the electrogeneration of  $\text{Cu}^{\text{I}}/\text{Me}_6\text{TREN}$  activators. That's why the eATRP of FcMMA in this work can be performed without deoxygenating.

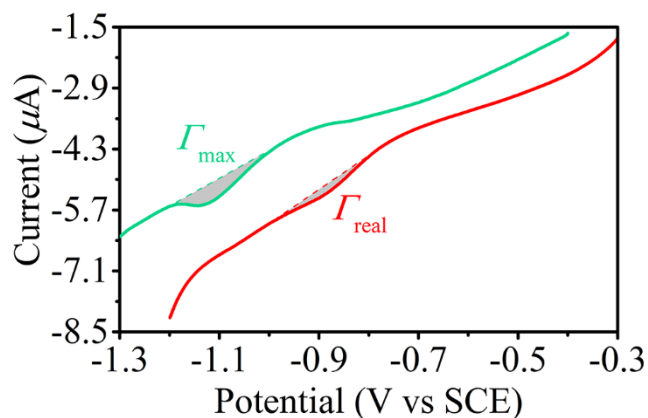

**Figure S-3:** LSV curves of reductive desorption of PSA peptides in 0.5 M KOH ( $N_2$  saturated). Scan rate,  $0.02 \text{ V s}^{-1}$ ; quiet time, 30 s. The  $\Gamma$  values can be calculated according to  $\Gamma = Q/FAv$ , where  $Q$ ,  $F$ ,  $A$ , and  $v$  represent the integral value of the desorption wave ( $\sim 0.0236 \mu\text{A V}$  for  $\Gamma_{\text{real}}$  and  $\sim 0.0488 \mu\text{A V}$  for  $\Gamma_{\text{max}}$ ), the Faraday constant, the electrochemical surface area ( $0.071 \text{ cm}^2$ ), and the scan rate ( $0.02 \text{ V s}^{-1}$ ).

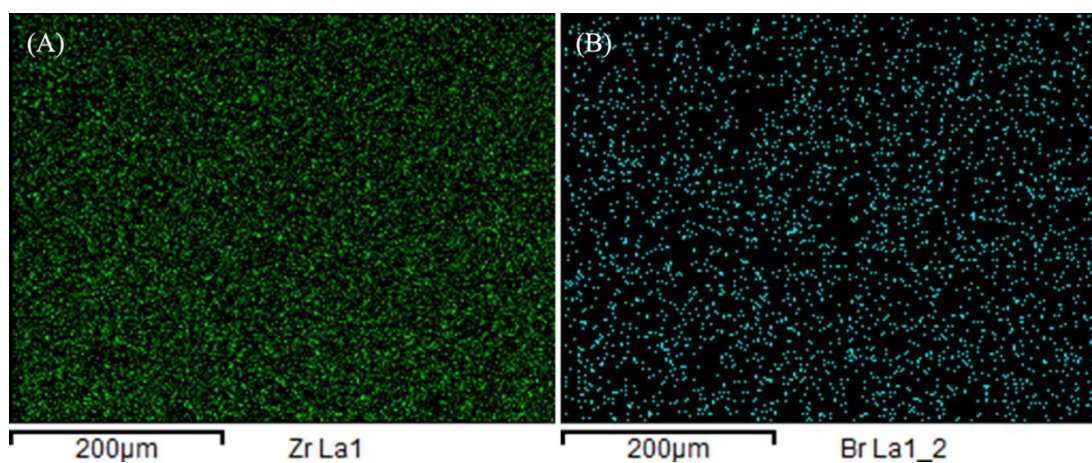

**Figure S-4:** Elemental mappings of (A) Zr and (B) Br. PSA, 10 nM.

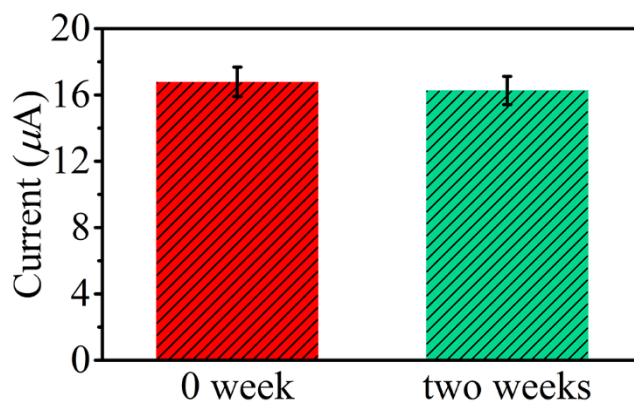

**Figure S-5:** Peak currents of the AuE/MCH/P-COOH/Zr(IV)/BPAA/Fc before and after a storage for two weeks. PSA, 10 nM. Error bars show the standard deviations ( $n = 4$ ).

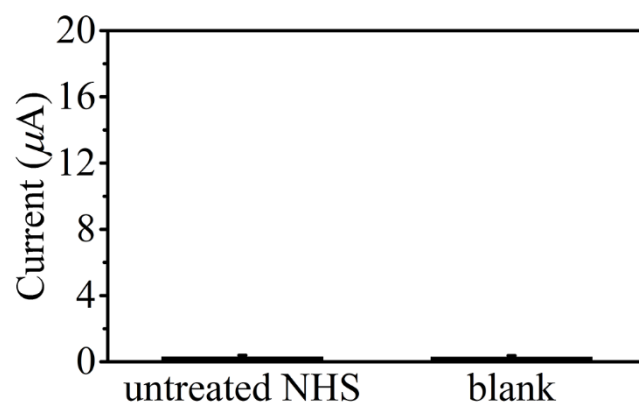

**Figure S-6:** Peak currents derived from the untreated NHS and the blank control. Error bars show the standard deviations ( $n = 4$ ).
